# Supplementary material
Source: MDPI journal article supplement (https://www.mdpi.com/2311-7524/9/2/268)
Supplement: s1 [file s1]

**Table S1.** The eigenvalues of principal component analysis (PCA).

| Principal<br>Component<br>Number | Eigenvalue | Percentage of<br>Variance (%) | Cumulative (%) |
|----------------------------------|------------|-------------------------------|----------------|
| 1                                | 22.55      | 70.47                         | 70.47          |
| 2                                | 6.24       | 19.49                         | 89.95          |
| 3                                | 2.83       | 8.84                          | 98.80          |
| 4                                | 0.13       | 0.40                          | 99.20          |
| 5                                | 0.07       | 0.22                          | 99.42          |
| 6                                | 0.06       | 0.19                          | 99.61          |
| 7                                | 0.04       | 0.14                          | 99.74          |
| 8                                | 0.03       | 0.10                          | 99.85          |
| 9                                | 0.02       | 0.08                          | 99.92          |
| 10                               | 0.01       | 0.05                          | 99.97          |
| 11                               | 0.01       | 0.03                          | 100.00         |
| 12                               | 0.00       | 0.00                          | 100.00         |

**Table S2.** The scores of principal component analysis (PCA).

| Observations | PC1 (70.5%) | PC2 (19.5%) |
|--------------|-------------|-------------|
| CK 1         | 1.184       | 0.243       |
| CK 2         | 1.189       | 0.199       |
| CK 3         | 1.172       | 0.242       |
| L 1          | -0.280      | 1.394       |
| L 2          | -0.279      | 1.432       |
| L 3          | -0.265      | 1.445       |
| LG 1         | 0.529       | -1.140      |
| LG 2         | 0.401       | -1.113      |
| LG 3         | 0.540       | -1.218      |
| LV 1         | -1.359      | -0.496      |
| LV 2         | -1.379      | -0.521      |
| LV 3         | -1.451      | -0.469      |

Comprehensive score (F):  $F = F1 \times 70.50\% + F2 \times 19.50\%$ ; F1, PC1 score; F2, PC2 score.

**Table S3.** The loadings of principal component analysis (PCA).

| <b>Variables</b> | <b>PC1</b> | <b>PC2</b> |
|------------------|------------|------------|
| Total-1d         | 0.202      | 0.075      |
| Total-2d         | 0.171      | -0.113     |
| Total-4d         | 0.200      | -0.088     |
| Total-6d         | 0.188      | -0.156     |
| EMP-1d           | 0.196      | 0.111      |
| EMP-2d           | 0.188      | -0.053     |
| EMP-4d           | 0.205      | -0.044     |
| EMP-6d           | 0.152      | -0.215     |
| TCAC-1d          | 0.203      | 0.092      |
| TCAC-2d          | 0.152      | -0.223     |
| TCAC-4d          | 0.108      | -0.320     |
| TCAC-6d          | 0.169      | 0.021      |
| PPP-1d           | -0.120     | -0.326     |
| PPP-2d           | -0.098     | -0.217     |
| PPP-4d           | 0.041      | 0.327      |
| PPP-6d           | 0.150      | 0.221      |
| CP-1d            | 0.174      | 0.216      |
| CP-2d            | 0.196      | 0.096      |
| CP-4d            | 0.208      | -0.001     |
| CP-6d            | 0.206      | 0.055      |
| AP-1d            | 0.144      | 0.291      |
| AP-2d            | -0.092     | 0.352      |
| AP-4d            | -0.201     | 0.109      |
| AP-6d            | 0.139      | 0.299      |
| RV-1d            | 0.188      | -0.160     |
| RV-2d            | 0.198      | -0.107     |
| RV-4d            | 0.202      | -0.086     |
| RV-6d            | 0.205      | -0.006     |
| MDA-1d           | -0.200     | -0.023     |
| MDA-2d           | -0.197     | 0.008      |
| MDA-4d           | -0.205     | 0.001      |
| MDA-6d           | -0.202     | 0.049      |
